# Supplementary material for: A hybridized heterojunction structure between TiO2nanorods and exfoliated graphitic carbon-nitride sheets for hydrogen evolution under visible light
Source: Royal Society of Chemistry journal article supplement (doi:10.1039/c6ce01442a), 2016-01-01
Supplement: c6ce01442a1.pdf [file c6ce01442a1.pdf]

**The Hybridized Heterojunction Structure between TiO<sub>2</sub> Nanorods with Exfoliated Graphitic Carbon Nitride Sheets for Hydrogen Evolution under Visible-light**

Yong Jiang, Shien Guo, Rong Hao, Yuting Luan, Yuqing Huang, Feng Wu, Chungui Tian\* and Baojiang Jiang\*

Key Laboratory of Functional Inorganic Material Chemistry, Ministry of Education of the People's Republic of China, Heilongjiang University, Harbin 150080, China;

E-mail: chunguitianhq@163.com; jiangbaojiang88@sina.com

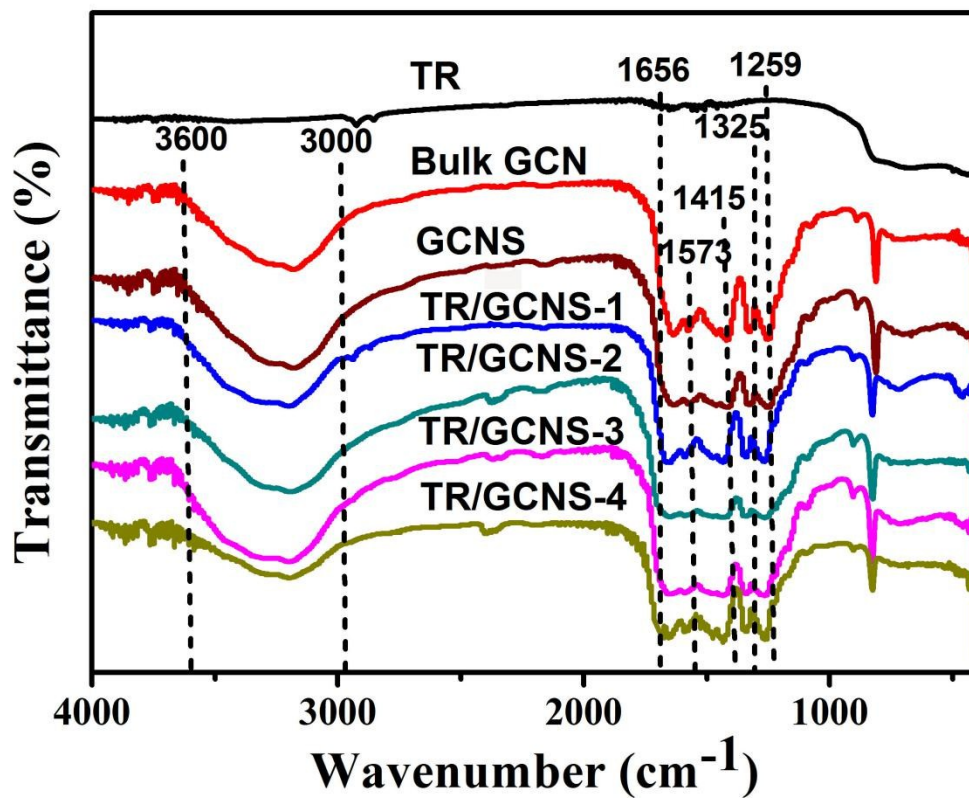

**Fig. S1** The FT-IR spectra of TR, bulk GCN, GCNS and TR/GCNS-X (X=1, 2, 3, 4).

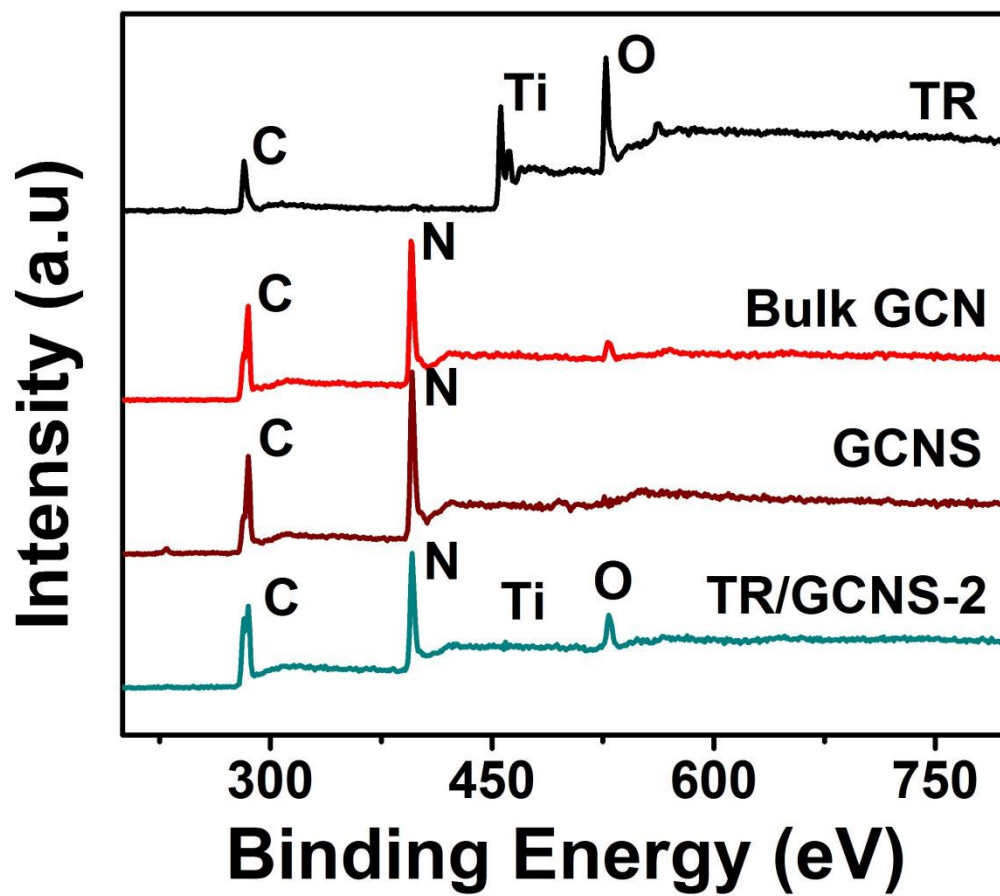

**Fig. S2** The XPS wide spectra of TR, bulk GCN, GCNS, and TR/GCNS-2 sample.

**Table S1.** The specific surface area results of all samples.

| Sample                                        | TR    | GCN   | GCNS  | TR/GCN<br>S-1 | TR/GCN<br>S-2 | TR/GCN<br>S-3 | TR/GCN<br>S-4 |
|-----------------------------------------------|-------|-------|-------|---------------|---------------|---------------|---------------|
| BET<br>Surface<br>Area<br>(m <sup>2</sup> /g) | 48.49 | 30.13 | 46.68 | 49.15         | 61.22         | 54.75         | 51.90         |

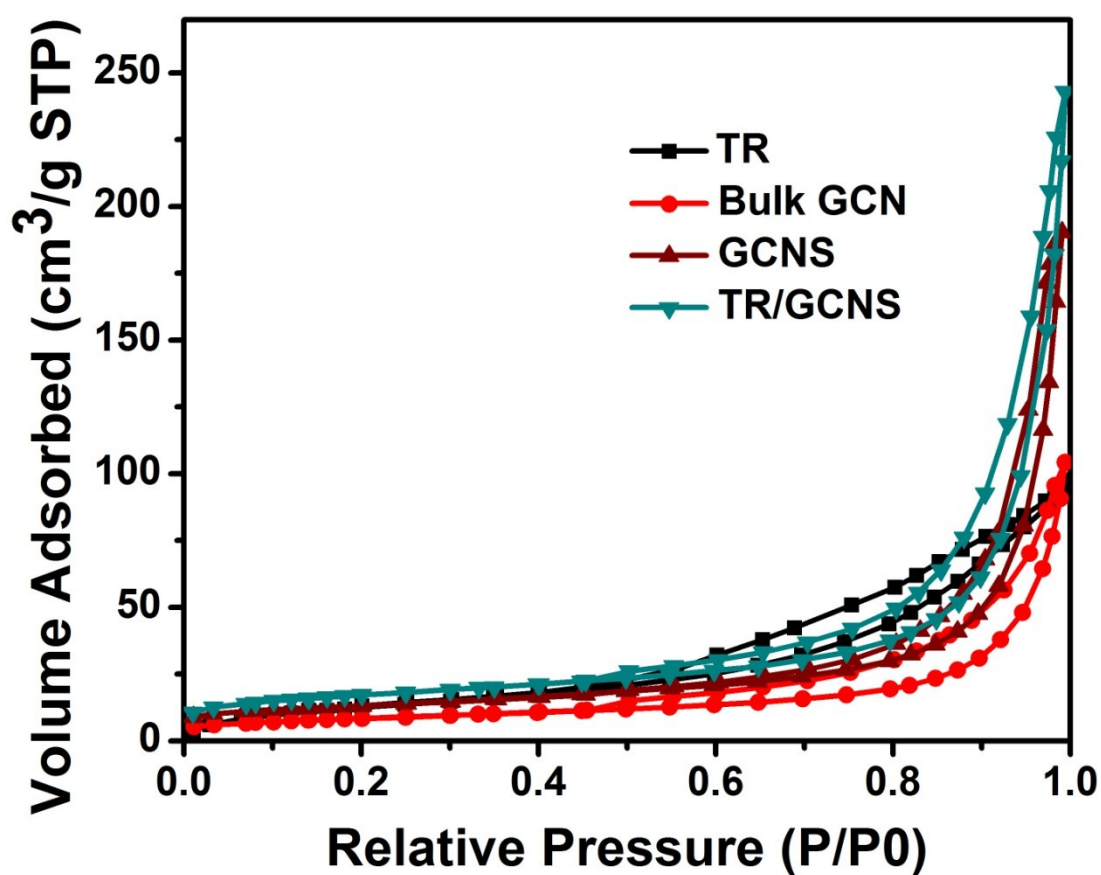

**Fig. S3** The BET spectra of TR, bulk GCN, GCNS, and TR/GCNS-2 sample.

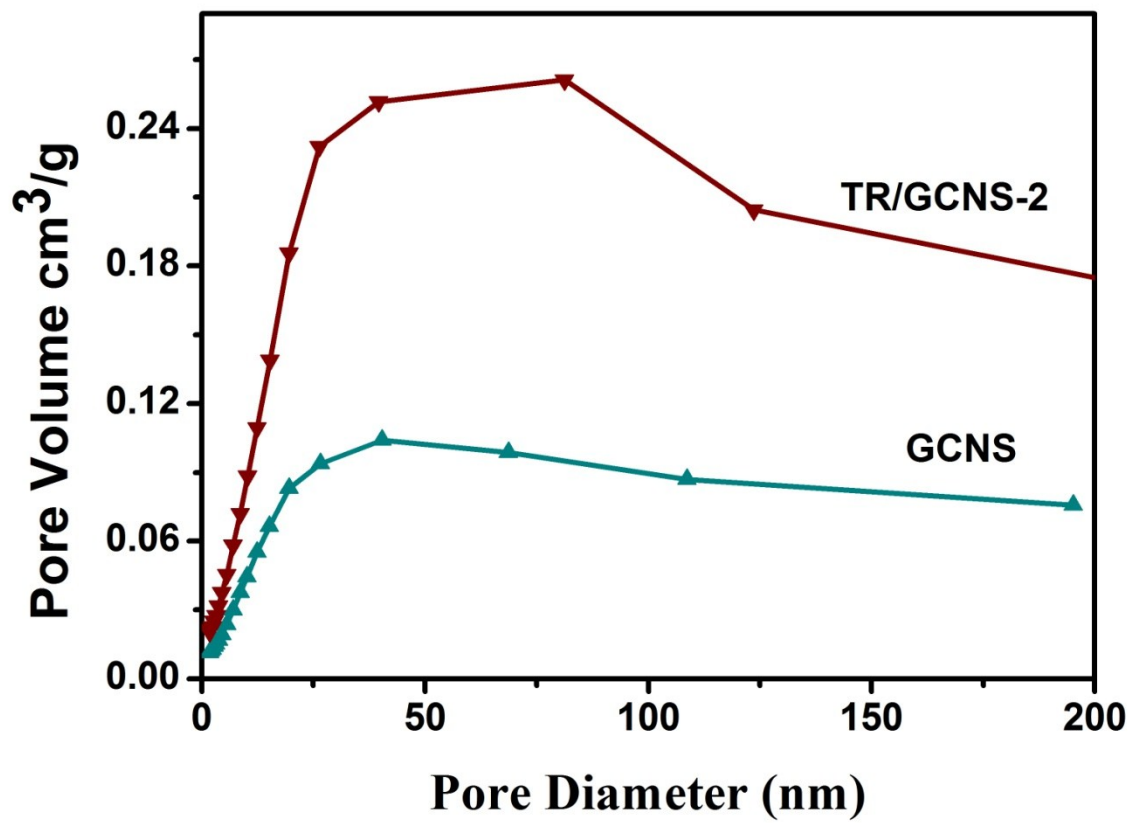

Fig. S4 The pore size distribution of GCNS and TR/GCNS-2 measured.
